# Supplementary material
Source: PubMed Central journal article supplement (PMC6075517)
Supplement: ntw219_suppl_supplemental_figure_s1_s2.pdf [file ntw219_suppl_supplemental_figure_s1_s2.pdf]

## **Supplemental Material**

**Title:** Secondhand Tobacco Smoke Exposure Associations with DNA Methylation of the Aryl Hydrocarbon Receptor Repressor

**Authors:** Lindsay M Reynolds PhD, Hoda S Magid MHS, Gloria C Chi MPH, Kurt Lohman Mstat, R Graham Barr MD, Joel D Kaufman MD, Ina Hoeschele PhD, Michael J Blaha MD, Ana Navas-Acien MD, Yongmei Liu PhD

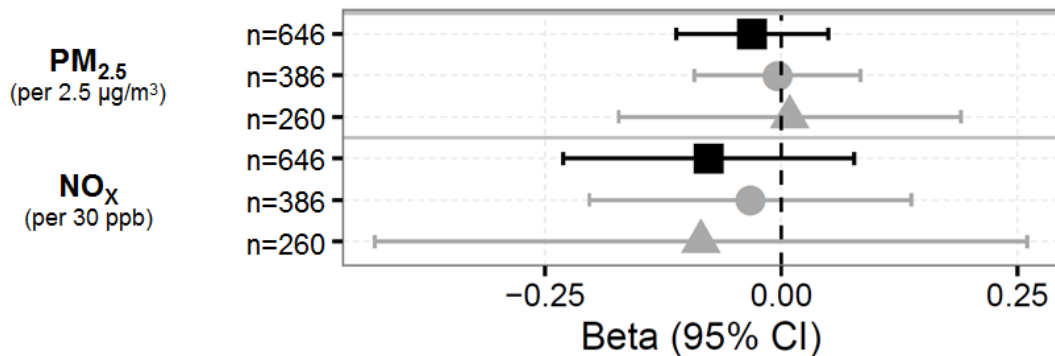

**Figure S1. Estimated effects of PM<sub>2.5</sub>, and NO<sub>x</sub> on cg05575921 methylation in non-smokers.** Forest plots shows effect sizes (Beta) and 95% confidence intervals (CI) of air pollution (fine particulate matter, PM<sub>2.5</sub> per 2.5 µg/m<sup>3</sup>, and oxides of nitrogen, NO<sub>x</sub> per 30 ppb) on cg05575921 methylation (x-axis) measured in monocyte samples; effect sizes on methylation are shown overall and stratified by smoking status (never and former smokers). Covariates included age, sex, race/ethnicity, education level, smoking status, pack-years, time since quitting smoking (former smokers only), hours per week of SHS exposure, site of data collection, and estimates of residual sample contamination with non-monocyte cell types. Significance indicated as follows: \*\*\*p < 0.001; \*\* 0.001 ≤ p < 0.01; \* 0.01 ≤ p < 0.05

**A**

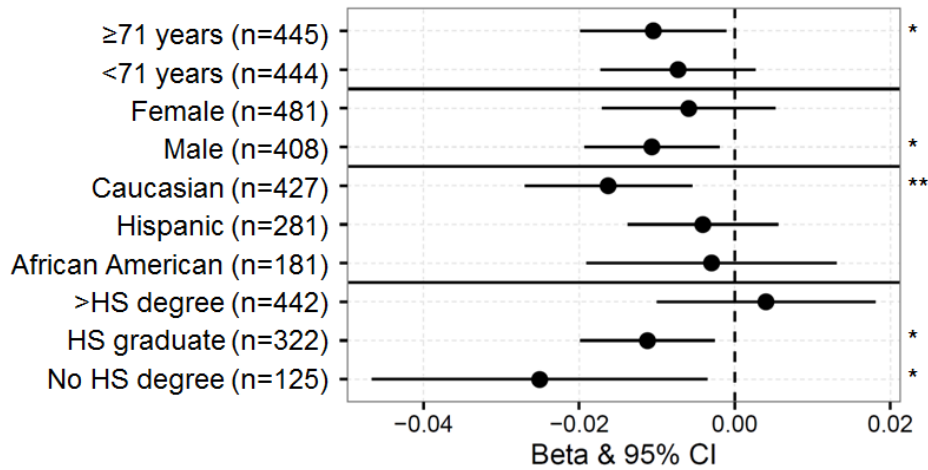

**B**

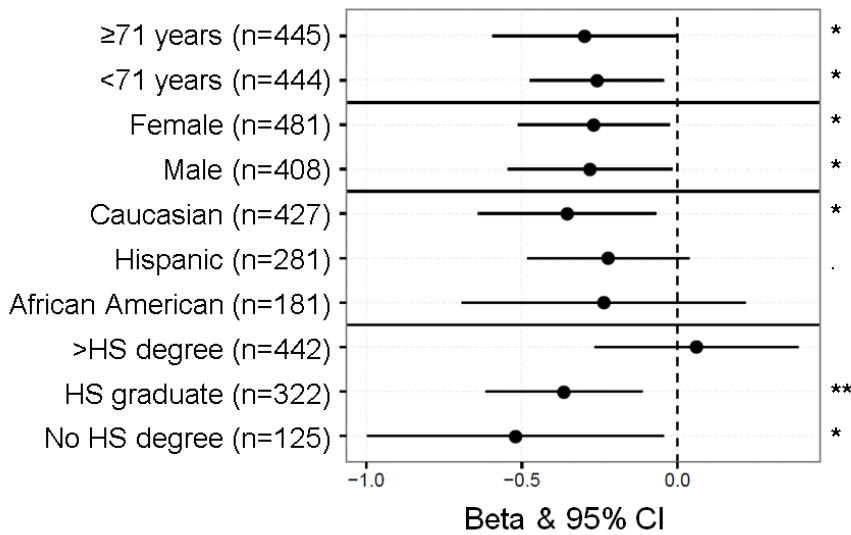

**Figure S2. Effect sizes between recent indoor SHS exposure and cg05575921 methylation in non-smokers.** Forest plots shows the effect sizes (Beta) and 95% confidence intervals (CI) of **A**) recent SHS exposure and **B**) high levels (≥10 hours per week) vs. no recent SHS exposure on cg05575921 methylation (x-axis) in CD14+ monocyte samples, subset by age (<71 years and ≥ 71 years), sex, race/ethnicity, and education (>high school (HS) degree\diploma, HS degree\diploma, and no HS degree\diploma). Significance indicated as follows: '\*\*\*\*'  $p < 0.001$ ; '\*\*\*'  $0.001 \leq p < 0.01$ ; '\*\*'  $0.01 \leq p < 0.05$ ; '.'  $0.05 \leq p < 0.10$ ; '.'  $p \geq 0.10$
